# Supplementary material for: Fungal Richness of Cytospora Species Associated with Willow Canker Disease in China
Source: MDPI journal article supplement (doi:10.3390/jof8040377), 2022-04-07
Supplement: s1 [file s1]

**Table S1.** Genes used in this study with PCR primers, primer DNA sequence, optimal annealing temperature.

| Locus         | Definition                                   | Primers   | Primer DNA sequence (5'–3')                  | Optimal annealing temp (°C) | References of primers used |
|---------------|----------------------------------------------|-----------|----------------------------------------------|-----------------------------|----------------------------|
| ITS           | internal transcribed spacer of ribosomal RNA | ITS1      | TCCGTAGGTGAACCTGCGG                          | 51                          | White et al. 1990          |
|               |                                              | ITS4      | TCCTCCGCTTTTGATATGC                          |                             |                            |
| <i>act</i>    | actin                                        | ACT-512F  | ATGTGCAAGGCCGGTTTCGC                         | 61                          | Carbone and Kohn, 1999     |
|               |                                              | ACT-783R  | TACGAGTCCTTCTGGCCCAT                         |                             |                            |
| <i>rpb2</i>   | RNA polymerase II second largest subunit     | RPB2-5F   | GA(T/C)GA(T/C)(A/C)G(A/T)GATCA(T/C)TT(T/C)GG | 52                          | Liu et al. 1999            |
|               |                                              | RPB2-7cR  | CCCAT(A/G)GCTTG(T/C)TT(A/G)CCCAT             |                             |                            |
| <i>tef-1α</i> | translation elongation factor 1-alpha        | EF1-688F  | CGGTCACTTGATCTACAAGTGC                       | 55                          | Alves et al. 2008          |
|               |                                              | EF1-1251R | CCTCGAACTCACCAGTACCG                         |                             |                            |
| <i>tub2</i>   | beta-tubulin                                 | Bt2a      | GGTAACCAAATCGGTGCTGCTTTG                     | 55                          | Glass and Donaldson, 1995  |
|               |                                              | Bt2b      | ACCCTCAGTGTAGTGACCCTTGGC                     |                             |                            |

Alves, A., Crous, P. W., Correia, A., Phillips, A. J. L. 2008. Morphological and molecular data reveal cryptic speciation in *Lasioidiplodia theobromae*. *Fungal Diversity* 28:1–13.

Carbone, I., Kohn, L. 1999. A method for designing primer sets for speciation studies in filamentous ascomycetes. *Mycologia* 91:553–556.

Glass, N. L., Donaldson, G. C. 1995. Development of primer sets designed for use with the PCR to amplify conserved genes from filamentous ascomycetes. *Applied and environmental microbiology* 61:1323–1330.

Liu, Y. L., Whelen, S., Hall, B. D. 1999. Phylogenetic relationships among ascomycetes: evidence from an RNA polymerase II subunit. *Molecular Biology and Evolution* 16:1799–1808.

White, T. J., Bruns, T., Lee, S., Taylor, J. 1990. Amplification and direct sequencing of fungal ribosomal RNA genes for phylogenetics. *PCR Protocols: A Guide to Methods and Applications* 18:315–322.

**Table S2.** Strains of *Cytospora* used in the molecular analyses in this study.

| Species                        | Strain <sup>1</sup>         | Host                          | Origin                | GenBank accession numbers |            |             |               |             |
|--------------------------------|-----------------------------|-------------------------------|-----------------------|---------------------------|------------|-------------|---------------|-------------|
|                                |                             |                               |                       | ITS                       | <i>act</i> | <i>rpb2</i> | <i>tefl-α</i> | <i>tub2</i> |
| <i>Cytospora ailanthicola</i>  | CFCC 55828                  | <i>Salix matsudana</i>        | Gansu, China          | OK156410                  | OK303491   | OK303564    | OK303627      | OK303694    |
| <i>Cytospora ailanthicola</i>  | BJFC-S516                   | <i>Salix matsudana</i>        | Ningxia, China        | OK147827                  | OK303492   | NA          | NA            | OK303695    |
| <i>Cytospora ailanthicola</i>  | BJFC-S519                   | <i>Salix matsudana</i>        | Ningxia, China        | OK147829                  | OK303494   | NA          | OK303628      | OK303697    |
| <i>Cytospora ailanthicola</i>  | CFCC 89970                  | <i>Ailanthus altissima</i>    | Ningxia, China        | MH933618                  | MH933526   | MH933592    | MH933494      | MH933565    |
| <i>Cytospora albodisca</i>     | CFCC 53161                  | <i>Platyclusus orientalis</i> | Beijing, China        | MW418406                  | MW422899   | MW422909    | MW422921      | MW422933    |
| <i>Cytospora albodisca</i>     | CFCC 54373                  | <i>Platyclusus orientalis</i> | Beijing, China        | MW418407                  | MW422900   | MW422910    | MW422922      | MW422934    |
| <i>Cytospora alba</i>          | CFCC 55461                  | <i>Salix matsudana</i>        | Gansu, China          | MZ702592                  | OK303454   | OK303513    | OK303574      | OK303641    |
| <i>Cytospora alba</i>          | CFCC 55462 <sup>T</sup>     | <i>Salix matsudana</i>        | Gansu, China          | MZ702593                  | OK303457   | OK303516    | OK303577      | OK303644    |
| <i>Cytospora alba</i>          | CFCC 55463 <sup>T</sup>     | <i>Salix matsudana</i>        | Gansu, China          | MZ702594                  | OK303458   | OK303517    | OK303578      | OK303645    |
| <i>Cytospora ampulliformis</i> | MFLUCC 16-0583 <sup>T</sup> | <i>Sorbus intermedia</i>      | Russia                | KY417726                  | KY417692   | KY417794    | NA            | NA          |
| <i>Cytospora ampulliformis</i> | MFLUCC 16-0629              | <i>Acer platanoides</i>       | Russia                | KY417727                  | KY417693   | KY417795    | NA            | NA          |
| <i>Cytospora amygdali</i>      | CBS 144233 <sup>T</sup>     | <i>Prunus dulcis</i>          | California, USA       | MG971853                  | MG972002   | NA          | MG971659      | MG971718    |
| <i>Cytospora atrocirrhatta</i> | CFCC 89615                  | <i>Juglans regia</i>          | Qinghai, China        | KR045618                  | KF498673   | KU710946    | KP310858      | KR045659    |
| <i>Cytospora atrocirrhatta</i> | CFCC 89616                  | <i>Juglans regia</i>          | Qinghai, China        | KR045619                  | KF498674   | KU710947    | KP310859      | KR045660    |
| <i>Cytospora atrocirrhatta</i> | CXY 1401                    | <i>Populus</i> sp.            | Inner Mongolia, China | JX534242                  | NA         | NA          | NA            | KM034904    |
| <i>Cytospora atrocirrhatta</i> | CXY 1402                    | <i>Populus</i> sp.            | Inner Mongolia, China | JX534243                  | NA         | NA          | NA            | KM034903    |
| <i>Cytospora beilinensis</i>   | CFCC 50493 <sup>T</sup>     | <i>Pinus armandii</i>         | Beijing, China        | MH933619                  | MH933527   | NA          | MH933495      | MH933561    |
| <i>Cytospora beilinensis</i>   | CFCC 50494                  | <i>Pinus armandii</i>         | Beijing, China        | MH933620                  | MH933528   | NA          | MH933496      | MH933562    |
| <i>Cytospora berberidis</i>    | CFCC 89927 <sup>T</sup>     | <i>Berberis dasystachya</i>   | Qinghai, China        | KR045620                  | KU710990   | KU710948    | KU710913      | KR045661    |
| <i>Cytospora berberidis</i>    | CFCC 89933                  | <i>Berberis dasystachya</i>   | Qinghai, China        | KR045621                  | KU710991   | KU710949    | KU710914      | KR045662    |

|                                      |                             |                                                  |                       |                 |           |                 |           |           |
|--------------------------------------|-----------------------------|--------------------------------------------------|-----------------------|-----------------|-----------|-----------------|-----------|-----------|
| <i>Cytospora bungeana</i>            | CFCC 50495 <sup>T</sup>     | <i>Pinus bungeana</i>                            | Shanxi, China         | MH933621        | MH933529  | MH933593        | MH933497  | MH933563  |
| <i>Cytospora bungeana</i>            | CFCC 50496                  | <i>Pinus bungeana</i>                            | Shanxi, China         | MH933622        | MH933530  | MH933594        | MH933498  | MH933564  |
| <i>Cytospora californica</i>         | CBS 144234 <sup>T</sup>     | <i>Juglans regia</i>                             | California, USA       | MG971935        | MG972083  | NA              | MG971645  | NA        |
| <i>Cytospora carbonacea</i>          | CFCC 89947                  | <i>Ulmus pumila</i>                              | Qinghai, China        | KR045622        | KP310842  | KU710950        | KP310855  | KP310825  |
| <i>Cytospora carpobroti</i>          | CMW 48981 <sup>T</sup>      | <i>Carpobrotus edulis</i>                        | South Africa          | MH382812        | NA        | NA              | MH411212  | MH411207  |
| <i>Cytospora celtidicola</i>         | CFCC 50497 <sup>T</sup>     | <i>Celtis sinensis</i>                           | Anhui, China          | MH933623        | MH933531  | MH933595        | MH933499  | MH933566  |
| <i>Cytospora celtidicola</i>         | CFCC 50498                  | <i>Celtis sinensis</i>                           | Anhui, China          | MH933624        | MH933532  | MH933596        | MH933500  | MH933567  |
| <i>Cytospora centrivillosa</i>       | MFLUCC 16-1206 <sup>T</sup> | <i>Sorbus domestica</i>                          | Italy                 | MF190122        | NA        | MF377600        | NA        | NA        |
| <i>Cytospora centrivillosa</i>       | MFLUCC 17-1660              | <i>Sorbus domestica</i>                          | Italy                 | MF190123        | NA        | MF377601        | NA        | NA        |
| <i>Cytospora ceratosperma</i>        | CFCC 89624                  | <i>Juglans regia</i>                             | Gansu, China          | KR045645        | NA        | KU710976        | KP310860  | KR045686  |
| <i>Cytospora ceratosperma</i>        | CFCC 89625                  | <i>Juglans regia</i>                             | Gansu, China          | KR045646        | NA        | KU710977        | KP31086   | KR045687  |
| <i>Cytospora ceratospermopsis</i>    | CFCC 89626 <sup>T</sup>     | <i>Juglans regia</i>                             | Shaanxi, China        | KR045647        | KU711011  | KU710978        | KU710934  | KR045688  |
| <i>Cytospora ceratospermopsis</i>    | CFCC 89627                  | <i>Juglans regia</i>                             | Shaanxi, China        | KR045648        | KU711012  | KU710979        | KU710935  | KR045689  |
| <b><i>Cytospora chrysosperma</i></b> | <b>CFCC 89629</b>           | <b><i>Salix psammophila</i></b>                  | <b>Shaanxi, China</b> | <b>KF765673</b> | <b>NA</b> | <b>KF765705</b> | <b>NA</b> | <b>NA</b> |
| <i>Cytospora chrysosperma</i>        | CFCC 89981                  | <i>Populus alba</i> subsp.<br><i>pyramidalis</i> | Gansu, China          | MH933625        | MH933533  | MH933597        | MH933501  | MH933568  |
| <i>Cytospora chrysosperma</i>        | CFCC 89982                  | <i>Ulmus pumila</i>                              | Tibet, China          | KP281261        | KP310835  | NA              | KP310848  | KP310818  |
| <i>Cytospora cinnamomea</i>          | CFCC 53178 <sup>T</sup>     | <i>Prunus armeniaca</i>                          | Xinjiang, China       | MK673054        | MK673024  | NA              | NA        | MK672970  |
| <i>Cytospora coryli</i>              | CFCC 53162 <sup>T</sup>     | <i>Corylus mandshurica</i>                       | Beijing, China        | MN854450        | NA        | MN850751        | MN850758  | MN861120  |
| <i>Cytospora corylina</i>            | CFCC 54684 <sup>T</sup>     | <i>Corylus heterophylla</i>                      | Beijing, China        | MW839861        | MW815951  | MW815937        | MW815886  | MW883969  |
| <i>Cytospora corylina</i>            | CFCC 54685                  | <i>Corylus heterophylla</i>                      | Beijing, China        | MW839862        | MW815952  | MW815938        | MW815887  | MW883970  |
| <i>Cytospora corylina</i>            | CFCC 54686                  | <i>Corylus heterophylla</i>                      | Beijing, China        | MW839863        | MW815953  | MW815939        | MW815888  | MW883971  |
| <i>Cytospora corylina</i>            | CFCC 54687                  | <i>Corylus heterophylla</i>                      | Beijing, China        | MW839864        | MW815954  | MW815940        | MW815889  | MW883972  |
| <i>Cytospora cotini</i>              | MFLUCC 14-1050 <sup>T</sup> | <i>Cotinus coggygria</i>                         | Russia                | KX430142        | NA        | KX430144        | NA        | NA        |

|                                  |                             |                               |                          |          |          |          |          |          |
|----------------------------------|-----------------------------|-------------------------------|--------------------------|----------|----------|----------|----------|----------|
| <i>Cytospora cotoneastricola</i> | CF 20197027                 | <i>Cotoneaster</i> sp.        | Tibet, China             | MK673072 | MK673042 | MK673012 | MK672958 | MK672988 |
| <i>Cytospora cotoneastricola</i> | CF 20197028                 | <i>Cotoneaster</i> sp.        | Tibet, China             | MK673073 | MK673043 | MK673013 | MK672959 | MK672989 |
| <i>Cytospora cotoneastricola</i> | CF 20197030                 | <i>Cotoneaster</i> sp.        | Tibet, China             | MK673074 | MK673044 | MK673014 | MK672960 | MK672990 |
| <i>Cytospora cotoneastricola</i> | CF 20197031 <sup>T</sup>    | <i>Cotoneaster</i> sp.        | Tibet, China             | MK673075 | MK673045 | MK673015 | MK672961 | MK672991 |
| <i>Cytospora curvata</i>         | MFLUCC 15-0865 <sup>T</sup> | <i>Salix alba</i>             | Russia                   | KY417728 | KY417694 | KY417796 | NA       | NA       |
| <i>Cytospora curvispora</i>      | CFCC 54000 <sup>T</sup>     | <i>Corylus heterophylla</i>   | Beijing, China           | MW839851 | MW815931 | MW815945 | MW815880 | MW883963 |
| <i>Cytospora curvispora</i>      | CFCC 54001                  | <i>Corylus heterophylla</i>   | Beijing, China           | MW839853 | MW815932 | MW815946 | MW815881 | MW883964 |
| <i>Cytospora curvispora</i>      | CFCC 54676                  | <i>Corylus heterophylla</i>   | Beijing, China           | MW839854 | MW815933 | MW815947 | MW815882 | MW883965 |
| <i>Cytospora curvispora</i>      | CFCC 54677                  | <i>Corylus heterophylla</i>   | Beijing, China           | MW839855 | MW815934 | MW815948 | MW815883 | MW883966 |
| <i>Cytospora curvispora</i>      | CFCC 54678                  | <i>Corylus heterophylla</i>   | Beijing, China           | MW839856 | MW815935 | MW815949 | MW815884 | MW883967 |
| <i>Cytospora curvispora</i>      | CFCC 54679                  | <i>Corylus heterophylla</i>   | Beijing, China           | MW839857 | MW815936 | MW815950 | MW815885 | MW883968 |
| <i>Cytospora davidiana</i>       | CXY 1350 <sup>T</sup>       | <i>Populus davidiana</i>      | Inner Mongolia,<br>China | KM034870 | NA       | NA       | NA       | NA       |
| <i>Cytospora discotoma</i>       | CFCC 53137 <sup>T</sup>     | <i>Platyclusus orientalis</i> | Beijing, China           | MW418404 | MW422897 | MW422907 | MW422919 | MW422931 |
| <i>Cytospora discotoma</i>       | CFCC 54368                  | <i>Platyclusus orientalis</i> | Beijing, China           | MW418405 | MW422898 | MW422908 | MW422920 | MW422932 |
| <i>Cytospora donetzica</i>       | MFLUCC 15-0864              | <i>Crataegus monogyna</i>     | Russia                   | KY417729 | KY417695 | KY417797 | NA       | NA       |
| <i>Cytospora donetzica</i>       | MFLUCC 16-0574 <sup>T</sup> | <i>Crataegus monogyna</i>     | Russia                   | KY417731 | KY417697 | KY417799 | NA       | NA       |
| <i>Cytospora donglingensis</i>   | CFCC 53159 <sup>T</sup>     | <i>Platyclusus orientalis</i> | Beijing, China           | MW418412 | MW422903 | MW422915 | MW422927 | MW422939 |
| <i>Cytospora donglingensis</i>   | CFCC 53160                  | <i>Platyclusus orientalis</i> | Beijing, China           | MW418414 | MW422905 | MW422917 | MW422929 | MW422941 |
| <i>Cytospora donglingensis</i>   | CFCC 54371                  | <i>Platyclusus orientalis</i> | Beijing, China           | MW418413 | MW422904 | MW422916 | MW422928 | MW422940 |
| <i>Cytospora donglingensis</i>   | CFCC 54372                  | <i>Platyclusus orientalis</i> | Beijing, China           | MW418415 | MW422906 | MW422918 | MW422930 | MW422942 |
| <i>Cytospora elaeagni</i>        | CFCC 89632                  | <i>Elaeagnus angustifolia</i> | Ningxia, China           | KR045626 | KU710995 | KU710955 | KU710918 | KR045667 |
| <i>Cytospora elaeagni</i>        | CFCC 89633                  | <i>Elaeagnus angustifolia</i> | Ningxia, China           | KF765677 | KU710996 | KU710956 | KU710919 | KR045668 |
| <i>Cytospora elaeagnicola</i>    | CFCC 52882 <sup>T</sup>     | <i>Elaeagnus angustifolia</i> | China                    | MK732341 | MK732344 | MK732347 | NA       | NA       |

|                                   |                               |                                 |                       |                 |                 |                 |                 |                 |
|-----------------------------------|-------------------------------|---------------------------------|-----------------------|-----------------|-----------------|-----------------|-----------------|-----------------|
| <i>Cytospora elaeagnicola</i>     | CFCC 52883                    | <i>Elaeagnus angustifolia</i>   | China                 | MK732342        | MK732345        | MK732348        | NA              | NA              |
| <i>Cytospora elaeagnicola</i>     | CFCC 52884                    | <i>Elaeagnus angustifolia</i>   | China                 | MK732343        | MK732346        | MK732349        | NA              | NA              |
| <i>Cytospora erumpens</i>         | CFCC 50022                    | <i>Prunus padus</i>             | Shanxi, China         | MH933627        | MH933534        | NA              | MH933502        | MH933569        |
| <i>Cytospora erumpens</i>         | MFLUCC 16-0580 <sup>T</sup>   | <i>Salix × fragilis</i>         | Russia                | KY417733        | KY417699        | KY417801        | NA              | NA              |
| <i>Cytospora erumpens</i>         | CFCC 53163                    | <i>Prunus padus</i>             | Xinjiang, China       | MK673059        | MK673029        | MK673000        | MK672948        | MK672975        |
| <i>Cytospora eucalypti</i>        | CBS 144241                    | <i>Eucalyptus globulus</i>      | California, USA       | MG971907        | MG972056        | NA              | MG971617        | MG971772        |
| <i>Cytospora euonymicola</i>      | CFCC 50499 <sup>T</sup>       | <i>Euonymus kiautschovicus</i>  | Shaanxi, China        | MH933628        | MH933535        | MH933598        | MH933503        | MH933570        |
| <i>Cytospora euonymicola</i>      | CFCC 50500                    | <i>Euonymus kiautschovicus</i>  | Shaanxi, China        | MH933629        | MH933536        | MH933599        | MH933504        | MH933571        |
| <i>Cytospora euonymina</i>        | CFCC 89993 <sup>T</sup>       | <i>Euonymus kiautschovicus</i>  | Shanxi, China         | MH933630        | MH933537        | MH933600        | MH933505        | MH933590        |
| <i>Cytospora euonymina</i>        | CFCC 89999                    | <i>Euonymus kiautschovicus</i>  | Shanxi, China         | MH933631        | MH933538        | MH933601        | MH933506        | MH933591        |
| <i>Cytospora fraxinigena</i>      | BBH 42442                     | <i>Fraxinus ornus</i>           | NA                    | MF190133        | NA              | NA              | NA              | NA              |
| <i>Cytospora fraxinigena</i>      | MFLUCC 14-0868 <sup>T</sup>   | <i>Fraxinus ornus</i>           | Italy                 | MF190133        | NA              | NA              | NA              | NA              |
| <i>Cytospora fugax</i>            | CXY 1371                      | <i>Populus simonii</i>          | Jilin, China          | KM034852        | NA              | NA              | NA              | KM034891        |
| <i>Cytospora fugax</i>            | CXY 1381                      | <i>Populus ussuriensis</i>      | Heilongjiang, China   | KM034853        | NA              | NA              | NA              | KM034890        |
| <i>Cytospora fusispora</i>        | NFCCI 4372                    | NA                              | India                 | MN227694        | NA              | NA              | NA              | NA              |
| <i>Cytospora galegicola</i>       | MFLUCC 18-1199 <sup>T</sup>   | <i>Galega officinalis</i>       | Forli-Cesena, Italy   | MK912128        | MN685810        | MN685820        | NA              | NA              |
| <i>Cytospora gigalocus</i>        | CFCC 89620 <sup>T</sup>       | <i>Juglans regia</i>            | Qinghai, China        | KR045628        | KU710997        | KU710957        | KU710920        | KR045669        |
| <i>Cytospora gigalocus</i>        | CFCC 89621                    | <i>Juglans regia</i>            | Qinghai, China        | KR045629        | KU710998        | KU710958        | KU710921        | KR045670        |
| <i>Cytospora gigaspora</i>        | CFCC 50014                    | <i>Juniperus procumbens</i>     | Shanxi, China         | KR045630        | KU710999.       | KU710959        | KU710922        | KR045671        |
| <b><i>Cytospora gigaspora</i></b> | <b>CFCC 89634<sup>T</sup></b> | <b><i>Salix psammophila</i></b> | <b>Shaanxi, China</b> | <b>KF765671</b> | <b>KU711000</b> | <b>KU710960</b> | <b>KU710923</b> | <b>KR045672</b> |
| <i>Cytospora globosa</i>          | MFLU 16-2054 <sup>T</sup>     | <i>Abies alba</i>               | Italy                 | MT177935        | NA              | MT432212        | MT454016        | NA              |
| <i>Cytospora granati</i>          | CBS 144237 <sup>T</sup>       | <i>Punica granatum</i>          | California, USA       | MG971799        | MG971949        | NA              | MG971514        | MG971664        |
| <i>Cytospora haidianensis</i>     | CFCC 54056                    | <i>Euonymus alatus</i>          | Beijing, China        | MT360041        | MT363978        | MT363987        | MT363997        | MT364007        |
| <i>Cytospora haidianensis</i>     | CFCC 54057 <sup>T</sup>       | <i>Euonymus alatus</i>          | Beijing, China        | MT360042        | MT363979        | MT363988        | MT363998        | MT364008        |

|                                 |                           |                              |                  |          |          |          |          |          |
|---------------------------------|---------------------------|------------------------------|------------------|----------|----------|----------|----------|----------|
| <i>Cytospora haidianensis</i>   | CFCC 54184                | <i>Euonymus alatus</i>       | Beijing, China   | MT360043 | MT363980 | MT363989 | MT363999 | MT364009 |
| <i>Cytospora hippophaës</i>     | CFCC 89639                | <i>Hippophaë rhamnoides</i>  | Gansu, China     | KR045632 | KU711001 | KU710961 | KU710924 | KR045673 |
| <i>Cytospora hippophaës</i>     | CFCC 89640                | <i>Hippophaë rhamnoides</i>  | Gansu, China     | KF765682 | KF765730 | KU710962 | KP310865 | KR045674 |
| <i>Cytospora japonica</i>       | CFCC 89956                | <i>Prunus cerasifera</i>     | Ningxia, China   | KR045624 | KU710993 | KU710953 | KU710916 | KR045665 |
| <i>Cytospora japonica</i>       | CFCC 89960                | <i>Prunus cerasifera</i>     | Ningxia, China   | KR045625 | KU710994 | KU710954 | KU710917 | KR045666 |
| <i>Cytospora joaquinensis</i>   | CBS 144235                | <i>Populus deltoides</i>     | California, USA  | MG971895 | MG972044 | NA       | MG971605 | MG971761 |
| <i>Cytospora junipericola</i>   | BBH 42444                 | <i>Juniperus communis</i>    | Italy            | MF190126 | NA       | NA       | MF377579 | NA       |
| <i>Cytospora junipericola</i>   | MFLU 17-0882 <sup>T</sup> | <i>Juniperus communis</i>    | Italy            | MF190125 | NA       | NA       | MF377580 | NA       |
| <i>Cytospora juniperina</i>     | CFCC 50501 <sup>T</sup>   | <i>Juniperus przewalskii</i> | Sichuan, China   | MH933632 | MH933539 | MH933602 | MH933507 | NA       |
| <i>Cytospora juniperina</i>     | CFCC 50502                | <i>Juniperus przewalskii</i> | Sichuan, China   | MH933633 | MH933540 | MH933603 | MH933508 | MH933572 |
| <i>Cytospora juniperina</i>     | CFCC 50503                | <i>Juniperus przewalskii</i> | Sichuan, China   | MH933634 | MH933541 | MH933604 | MH933509 | NA       |
| <i>Cytospora kantschavelii</i>  | CXY 1383                  | <i>Populus maximowiczii</i>  | Jilin, China     | KM034867 | NA       | NA       | NA       | NA       |
| <i>Cytospora kantschavelii</i>  | CXY 1386                  | <i>Populus maximowiczii</i>  | Chongqing, China | KM034867 | NA       | NA       | NA       | NA       |
| <i>Cytospora kuanchengensis</i> | CFCC 52464 <sup>T</sup>   | <i>Castanea mollissima</i>   | China            | MK432616 | MK442940 | MK578076 | NA       | NA       |
| <i>Cytospora kuanchengensis</i> | CFCC 52465                | <i>Castanea mollissima</i>   | China            | MK432617 | MK442941 | MK578077 | NA       | NA       |
| <i>Cytospora longispora</i>     | CBS 144236 <sup>T</sup>   | <i>Prunus domestica</i>      | California, USA  | MG971905 | MG972054 | NA       | MG971615 | MG971764 |
| <i>Cytospora longistiolata</i>  | MFLUCC 16-0628            | <i>Salix × fragilis</i>      | Russia           | KY417734 | KY417700 | KY417802 | NA       | NA       |
| <i>Cytospora leucosperma</i>    | CFCC 89622                | <i>Pyrus bretschneideri</i>  | Gansu, China     | KR045616 | KU710988 | KU710944 | KU710911 | KR045657 |
| <i>Cytospora leucosperma</i>    | CFCC 89894                | <i>Pyrus bretschneideri</i>  | Qinghai, China   | KR045617 | KU710989 | KU710945 | KU710912 | KR045658 |
| <i>Cytospora leucostoma</i>     | CFCC 50023                | <i>Cornus alba</i>           | Shanxi, China    | KR045635 | KU711003 | KU710964 | KU710926 | KR045676 |
| <i>Cytospora leucostoma</i>     | CFCC 50024                | <i>Prunus pseudocerasus</i>  | Qinghai, China   | MH933640 | MH933547 | MH933605 | NA       | MH933576 |
| <i>Cytospora leucostoma</i>     | CFCC 53140                | <i>Prunus sibirica</i>       | Beijing, China   | MN854445 | MN850760 | MN850746 | MN850753 | MN861115 |
| <i>Cytospora leucostoma</i>     | CFCC 53141                | <i>Prunus sibirica</i>       | Beijing, China   | MN854446 | MN850761 | MN850747 | MN850754 | MN861116 |
| <i>Cytospora leucostoma</i>     | CFCC 53156                | <i>Juglans mandshurica</i>   | Beijing, China   | MN854447 | MN850762 | MN850748 | MN850755 | MN861117 |

|                                   |                             |                                          |                       |                 |           |                 |                 |                 |
|-----------------------------------|-----------------------------|------------------------------------------|-----------------------|-----------------|-----------|-----------------|-----------------|-----------------|
| <i>Cytospora leucostoma</i>       | CFCC 53167                  | <i>Prunus armeniaca</i>                  | Xinjiang, China       | MK673056        | MK673026  | MK672998        | MK672946        | MK672972        |
| <i>Cytospora leucostoma</i>       | CFCC 53169                  | <i>Prunus persica</i>                    | Beijing, China        | MK673080        | MK673050  | MK673020        | MK672966        | MK672996        |
| <i>Cytospora leucostoma</i>       | CFCC 53170                  | <i>Prunus persica</i>                    | Beijing, China        | MK673081        | MK673051  | MK673021        | MK672967        | MK672997        |
| <i>Cytospora leucostoma</i>       | CFCC 54680                  | <i>Corylus heterophylla</i>              | Beijing, China        | MW839857        | MW815941  | MW815955        | MW815890        | MW883973        |
| <i>Cytospora leucostoma</i>       | CFCC 54681                  | <i>Corylus heterophylla</i>              | Beijing, China        | MW839857        | MW815942  | MW815956        | MW815891        | MW883974        |
| <i>Cytospora leucostoma</i>       | CFCC 54682                  | <i>Corylus heterophylla</i>              | Beijing, China        | MW839857        | MW815943  | MW815957        | MW815892        | MW883975        |
| <i>Cytospora leucostoma</i>       | CFCC 54683                  | <i>Corylus heterophylla</i>              | Beijing, China        | MW839857        | MW815944  | MW815958        | MW815893        | MW883976        |
| <i>Cytospora lumnitzericola</i>   | MFLUCC 17-0508 <sup>T</sup> | <i>Lumnitzera racernosa</i>              | Tailand               | MG975778        | MH253457  | MH253453        | NA              | NA              |
| <i>Cytospora mali</i>             | CFCC 50028                  | <i>Malus pumila</i>                      | Gansu, China          | MH933641        | MH933548  | MH933606        | MH933513        | MH933577        |
| <i>Cytospora mali</i>             | CFCC 50029                  | <i>Malus pumila</i>                      | Ningxia, China        | MH933642        | MH933549  | MH933607        | MH933514        | MH933578        |
| <i>Cytospora mali</i>             | CFCC 50030                  | <i>Malus pumila</i>                      | Shaanxi, China        | MH933643        | MH933550  | MH933608        | MH933524        | MH933579        |
| <i>Cytospora mali</i>             | CFCC 50031                  | <i>Crataegus</i> sp.                     | Shanxi, China         | KR045636        | KU711004  | KU710965        | KU710927        | KR045677        |
| <i>Cytospora mali</i>             | CFCC 50044                  | <i>Malus baccata</i>                     | Qinghai, China        | KR045637        | KU711005  | KU710966        | KU710928        | KR045678        |
| <i>Cytospora mali-spectabilis</i> | CFCC 53181 <sup>T</sup>     | <i>Malus spectabilis</i> ‘Royalty’       | Xinjiang, China       | MK673066        | MK673036  | MK673006        | MK672953        | MK672982        |
| <i>Cytospora melnikii</i>         | CFCC 89984                  | <i>Rhus typhina</i>                      | Xinjiang, China       | MH933678        | MH933551  | MH933609        | MH933515        | MH933580        |
| <i>Cytospora melnikii</i>         | MFLUCC 15-0851              | <i>Malus domestica</i>                   | Russia                | KY417735        | KY417701  | KY417803        | NA              | NA              |
| <i>Cytospora melnikii</i>         | MFLUCC 16-0635              | <i>Populus nigra</i> var. <i>italica</i> | Russia                | KY417736        | KY417702  | KY417804        | NA              | NA              |
| <i>Cytospora myrtagena</i>        | CFCC 52454                  | <i>Castanea mollissima</i>               | China                 | MK432614        | MK442938  | MK578074        | NA              | NA              |
| <i>Cytospora myrtagena</i>        | CFCC 52455                  | <i>Castanea mollissima</i>               | China                 | MK432615        | MK442939  | MK578075        | NA              | NA              |
| <i>Cytospora nivea</i>            | MFLUCC 15-0860              | <i>Salix acutifolia</i>                  | Russia                | KY417737        | KY417703  | KY417805        | NA              | NA              |
| <i>Cytospora nivea</i>            | CFCC 89641                  | <i>Elaeagnus angustifolia</i>            | Ningxia, China        | KF765683        | KU711006  | KU710967        | KU710929        | KR045679        |
| <b><i>Cytospora nivea</i></b>     | <b>CFCC 89643</b>           | <b><i>Salix psammophila</i></b>          | <b>Shaanxi, China</b> | <b>KF765685</b> | <b>NA</b> | <b>KU710968</b> | <b>KP310863</b> | <b>KP310829</b> |
| <i>Cytospora notastroma</i>       | NE_TFR5                     | <i>Populus tremuloides</i>               | USA                   | JX438632        | NA        | NA              | JX438543        | NA              |
| <i>Cytospora notastroma</i>       | NE_TFR8                     | <i>Populus tremuloides</i>               | USA                   | JX438633        | NA        | NA              | JX438542        | NA              |

|                                        |                             |                               |                     |                 |                 |                 |                 |                 |
|----------------------------------------|-----------------------------|-------------------------------|---------------------|-----------------|-----------------|-----------------|-----------------|-----------------|
| <i>Cytospora ochracea</i>              | CFCC 53164 <sup>T</sup>     | <i>Cotoneaster</i> sp.        | Xinjiang, China     | MK673060        | MK673030        | MK673001        | MK672949        | MK672976        |
| <i>Cytospora oleicola</i>              | CBS 144248 <sup>T</sup>     | <i>Olea europaea</i>          | California, USA     | MG971944        | MG972098        | NA              | MG971660        | MG971752        |
| <i>Cytospora olivacea</i>              | CFCC 53174                  | <i>Prunus cerasifera</i>      | Xinjiang, China     | MK673058        | MK673028        | MK672999        | NA              | MK672974        |
| <i>Cytospora olivacea</i>              | CFCC 53175                  | <i>Prunus dulcis</i>          | Xinjiang, China     | MK673062        | MK673032        | MK673003        | NA              | MK672978        |
| <i>Cytospora olivacea</i>              | CFCC 53176 <sup>T</sup>     | <i>Sorbus tianschanica</i>    | Xinjiang, China     | MK673068        | MK673038        | MK673008        | MK672955        | MK672984        |
| <i>Cytospora olivacea</i>              | CFCC 53177                  | <i>Prunus virginiana</i>      | Xinjiang, China     | MK673071        | MK673041        | MK673011        | NA              | MK672987        |
| <i>Cytospora palm</i>                  | CXY 1276                    | <i>Cotinus coggygria</i>      | Beijing, China      | JN402990        | NA              | NA              | KJ781296        | NA              |
| <i>Cytospora palm</i>                  | CXY 1280 <sup>T</sup>       | <i>Cotinus coggygria</i>      | Beijing, China      | JN411939        | NA              | NA              | KJ781297        | NA              |
| <b><i>Cytospora paracinnamomea</i></b> | <b>CFCC 55452</b>           | <b><i>Salix matsudana</i></b> | <b>Gansu, China</b> | <b>MZ702593</b> | <b>OK303455</b> | <b>OK303514</b> | <b>OK303575</b> | <b>OK303642</b> |
| <i>Cytospora paracinnamomea</i>        | CFCC 55453 <sup>T</sup>     | <i>Salix matsudana</i>        | Gansu, China        | MZ702594        | OK303456        | OK303515        | OK303576        | OK303643        |
| <i>Cytospora paracinnamomea</i>        | CFCC 55454                  | <i>Salix matsudana</i>        | Gansu, China        | MZ702597        | OK303459        | OK303518        | OK303579        | OK303646        |
| <i>Cytospora paracinnamomea</i>        | CFCC 55455 <sup>T</sup>     | <i>Salix matsudana</i>        | Gansu, China        | MZ702598        | OK303460        | OK303519        | OK303580        | OK303647        |
| <i>Cytospora paracinnamomea</i>        | CFCC 55456                  | <i>Salix matsudana</i>        | Gansu, China        | MZ702599        | OK303461        | OK303520        | OK303581        | OK303648        |
| <i>Cytospora paracinnamomea</i>        | CFCC 55457                  | <i>Salix matsudana</i>        | Gansu, China        | MZ702600        | OK303462        | OK303521        | OK303582        | OK303649        |
| <i>Cytospora paracinnamomea</i>        | CFCC 55458                  | <i>Salix matsudana</i>        | Gansu, China        | MZ702601        | OK303463        | OK303522        | OK303583        | OK303650        |
| <i>Cytospora paracinnamomea</i>        | CFCC 55459                  | <i>Salix matsudana</i>        | Gansu, China        | MZ702602        | OK303464        | OK303523        | OK303584        | OK303651        |
| <i>Cytospora paracinnamomea</i>        | CFCC 55460                  | <i>Salix matsudana</i>        | Gansu, China        | MZ702603        | OK303465        | OK303524        | OK303585        | OK303652        |
| <i>Cytospora parakantschavelii</i>     | MFLUCC 15-0857 <sup>T</sup> | <i>Populus × sibirica</i>     | Russia              | KY417738        | KY417704        | KY417806        | NA              | NA              |
| <i>Cytospora parakantschavelii</i>     | MFLUCC 16-0575              | <i>Pyrus pyraister</i>        | Russia              | KY417739        | KY417705        | KY417807        | NA              | NA              |
| <i>Cytospora parapistaciae</i>         | CBS 144506 <sup>T</sup>     | <i>Pistacia vera</i>          | California, USA     | MG971804        | MG971954        | NA              | MG971519        | MG971669        |
| <i>Cytospora parasitica</i>            | MFLUCC 15-0507 <sup>T</sup> | <i>Malus domestica</i>        | Russia              | KY417740        | KY417706        | KY417808        | NA              | NA              |
| <i>Cytospora parasitica</i>            | XJAU 2542-1                 | <i>Malus</i> sp.              | Xinjiang, China     | MH798884        | NA              | NA              | MH813452        | NA              |
| <i>Cytospora parasitica</i>            | CFCC 53171                  | <i>Malus pumila</i>           | Xinjiang, China     | MK673061        | MK673031        | MK673002        | MK672950        | MK672977        |
| <i>Cytospora parasitica</i>            | CFCC 53172                  | <i>Malus pumila</i>           | Xinjiang, China     | MK673069        | MK673039        | MK673009        | MK672956        | MK672985        |



|                                  |                               |                                          |                       |                 |                 |                 |                 |                 |
|----------------------------------|-------------------------------|------------------------------------------|-----------------------|-----------------|-----------------|-----------------|-----------------|-----------------|
| <i>Cytospora parasitica</i>      | CFCC 53173                    | <i>Berberis</i> sp.                      | Xinjiang, China       | MK673070        | MK673040        | MK673010        | MK672957        | MK672986        |
| <i>Cytospora paratranslucens</i> | MFLUCC 15-0506 <sup>T</sup>   | <i>Populus alba</i> var. <i>bolleana</i> | Russia                | KY417741        | KY417707        | KY417809        | NA              | NA              |
| <i>Cytospora paratranslucens</i> | MFLUCC 16-0627                | <i>Populus alba</i>                      | Russia                | KY417742        | KY417708        | KY417810        | NA              | NA              |
| <i>Cytospora phialidica</i>      | MFLUCC 17-2498                | <i>Alnus glutinosa</i>                   | Italy                 | MT177932        | NA              | MT432209        | MT454014        | NA              |
| <i>Cytospora piceae</i>          | CFCC 52841 <sup>T*</sup>      | <i>Picea crassifolia</i>                 | Xinjiang, China       | MH820398        | MH820406        | MH820395        | MH820402        | MH820387        |
| <i>Cytospora piceae</i>          | CFCC 52842*                   | <i>Picea crassifolia</i>                 | Xinjiang, China       | MH820399        | MH820407        | MH820396        | MH820403        | MH820388        |
| <i>Cytospora pingbianensis</i>   | MFLUCC 18-1204 <sup>T</sup>   | Undefined wood                           | Yunnan, China         | MK912135        | MN685817        | MN685826        | NA              | NA              |
| <i>Cytospora pistaciae</i>       | CBS 144238 <sup>T</sup>       | <i>Pistacia vera</i>                     | California, USA       | MG971802        | MG971952        | NA              | MG971517        | MG971667        |
| <i>Cytospora platanicola</i>     | MFLU 17-0327                  | <i>Platanus hybrida</i>                  | Italy                 | MH253451        | MH253449        | MH253450        | NA              | NA              |
| <i>Cytospora platycladi</i>      | CFCC 50504 <sup>T*</sup>      | <i>Platyclusus orientalis</i>            | Yunnan, China         | MH933645        | MH933552        | MH933610        | MH933516        | MH933581        |
| <i>Cytospora platycladi</i>      | CFCC 50505*                   | <i>Platyclusus orientalis</i>            | Yunnan, China         | MH933646        | MH933553        | MH933611        | MH933517        | MH933582        |
| <i>Cytospora platycladi</i>      | CFCC 50506*                   | <i>Platyclusus orientalis</i>            | Yunnan, China         | MH933647        | MH933554        | MH933612        | MH933518        | MH933583        |
| <i>Cytospora platycladicola</i>  | CFCC 50038 <sup>T*</sup>      | <i>Platyclusus orientalis</i>            | Gansu, China          | KT222840        | MH933555        | MH933613        | MH933519        | MH933584        |
| <i>Cytospora platycladicola</i>  | CFCC 50039*                   | <i>Platyclusus orientalis</i>            | Gansu, China          | KR045642        | KU711008        | KU710973        | KU710931        | KR045683        |
| <i>Cytospora plurivora</i>       | CBS 144239 <sup>T</sup>       | <i>Olea europaea</i>                     | California, USA       | MG971861        | MG972010        | NA              | MG971572        | MG971726        |
| <i>Cytospora populicola</i>      | CBS 144240                    | <i>Populus deltoides</i>                 | California, USA       | MG971891        | MG972040        | NA              | MG971601        | MG971757        |
| <b><i>Cytospora populina</i></b> | <b>CFCC 89644<sup>T</sup></b> | <b><i>Salix psammophila</i></b>          | <b>Shaanxi, China</b> | <b>KF765686</b> | <b>KU711007</b> | <b>KU710969</b> | <b>KU710930</b> | <b>KR045681</b> |
| <i>Cytospora populinopsis</i>    | CFCC 50032 <sup>T</sup>       | <i>Sorbus aucuparia</i>                  | Ningxia, China        | MH933648        | MH933556        | MH933614        | MH933520        | MH933585        |
| <i>Cytospora populinopsis</i>    | CFCC 50033                    | <i>Sorbus aucuparia</i>                  | Ningxia, China        | MH933649        | MH933557        | MH933615        | MH933521        | MH933586        |
| <i>Cytospora predappioensis</i>  | MFLUCC 17-2458 <sup>T</sup>   | <i>Platanus hybrida</i>                  | Italy                 | MG873484        | NA              | NA              | NA              | NA              |
| <i>Cytospora prunicola</i>       | MFLU 17-0995 <sup>T</sup>     | <i>Prunus</i> sp.                        | Italy                 | MG742350        | MG742353        | MG742352        | NA              | NA              |
| <i>Cytospora pruni-mume</i>      | CFCC 53179                    | <i>Prunus armeniaca</i>                  | Xinjiang, China       | MK673057        | MK673027        | NA              | MK672947        | MK672973        |
| <i>Cytospora pruni-mume</i>      | CFCC 53180 <sup>T</sup>       | <i>Prunus mume</i>                       | Xinjiang, China       | MK673067        | MK673037        | MK673007        | MK672954        | MK672983        |
| <i>Cytospora pruinopsis</i>      | CFCC 50034 <sup>T</sup>       | <i>Ulmus pumila</i>                      | Shaanxi, China        | KP281259        | KP310836        | KU710970        | KP310849        | KP310819        |

|                                  |                             |                                          |                     |                 |                 |                 |                 |                 |
|----------------------------------|-----------------------------|------------------------------------------|---------------------|-----------------|-----------------|-----------------|-----------------|-----------------|
| <i>Cytospora pruinopsis</i>      | CFCC 50035                  | <i>Ulmus pumila</i>                      | Jilin, China        | KP281260        | KP310837        | KU710971        | KP310850        | KP310820        |
| <i>Cytospora pruinopsis</i>      | CFCC 53153                  | <i>Ulmus pumila</i>                      | Beijing, China      | MN854451        | MN850763        | MN850752        | MN850759        | MN861121        |
| <i>Cytospora pruinosa</i>        | CFCC 50036                  | <i>Syringa oblata</i>                    | Qinghai, China      | KP310800        | KP310832        | NA              | KP310845        | KP310815        |
| <i>Cytospora pruinosa</i>        | CFCC 50037                  | <i>Syringa oblata</i>                    | Qinghai, China      | MH933650        | MH933558        | NA              | MH933522        | MH933589        |
| <i>Cytospora pubescentis</i>     | MFLUCC 18-1201 <sup>T</sup> | <i>Quercus pubescens</i>                 | Forli-Cesena, Italy | MK912130        | MN685812        | MN685821        | NA              | NA              |
| <i>Cytospora punicae</i>         | CBS 144244                  | <i>Punica granatum</i>                   | California, USA     | MG971943        | MG972091        | NA              | MG971654        | MG971798        |
| <i>Cytospora quercicola</i>      | MFLU 17-0881                | <i>Quercus</i> sp.                       | Italy               | MF190128        | NA              | NA              | NA              | NA              |
| <i>Cytospora quercicola</i>      | MFLUCC 14-0867 <sup>T</sup> | <i>Quercus</i> sp.                       | Italy               | MF190129        | NA              | NA              | NA              | NA              |
| <i>Cytospora ribis</i>           | CFCC 50026                  | <i>Ulmus pumila</i>                      | Qinghai, China      | KP281267        | KP310843        | KU710972        | KP310856        | KP310826        |
| <i>Cytospora ribis</i>           | CFCC 50027                  | <i>Ulmus pumila</i>                      | Qinghai, China      | KP281268        | KP310844        | NA              | KP310857        | KP310827        |
| <i>Cytospora rosae</i>           | MFLU 17-0885                | <i>Rosa canina</i>                       | Italy               | MF190131        | NA              | NA              | NA              | NA              |
| <i>Cytospora rosicola</i>        | CF 20197024 <sup>T</sup>    | <i>Rosa</i> sp.                          | Tibet, China        | MK673079        | MK673049        | MK673019        | MK672965        | MK672995        |
| <i>Cytospora rosigena</i>        | MFLUCC 18-0921 <sup>T</sup> | <i>Rosa</i> sp.                          | Russia              | MN879872        | NA              | NA              | NA              | NA              |
| <b><i>Cytospora rostrata</i></b> | <b>CFCC 89909</b>           | <b><i>Salix cupularis</i></b>            | <b>Gansu, China</b> | <b>KR045643</b> | <b>KU711009</b> | <b>KU710974</b> | <b>KU710932</b> | <b>KR045684</b> |
| <b><i>Cytospora rostrata</i></b> | <b>CFCC 89910</b>           | <b><i>Salix cupularis</i></b>            | <b>Gansu, China</b> | <b>KR045644</b> | <b>KU711010</b> | <b>KU710975</b> | <b>KU710933</b> | <b>NA</b>       |
| <i>Cytospora rusanovii</i>       | MFLUCC 15-0853              | <i>Populus × sibirica</i>                | Russia              | KY417743        | KY417709        | KY417811        | NA              | NA              |
| <i>Cytospora rusanovii</i>       | MFLUCC 15-0854 <sup>T</sup> | <i>Salix babylonica</i>                  | Russia              | KY417744        | KY417710        | KY417812        | NA              | NA              |
| <i>Cytospora salicacearum</i>    | MFLUCC 15-0509              | <i>Salix alba</i>                        | Russia              | KY417746        | KY417712        | KY417814        | NA              | NA              |
| <i>Cytospora salicacearum</i>    | MFLUCC 15-0861              | <i>Salix × fragilis</i>                  | Russia              | KY417745        | KY417711        | KY417813        | NA              | NA              |
| <i>Cytospora salicacearum</i>    | MFLUCC 16-0587              | <i>Prunus cerasus</i>                    | Russia              | KY417742        | KY417708        | KY417810        | NA              | NA              |
| <i>Cytospora salicacearum</i>    | MFLUCC 16-0576              | <i>Populus nigra</i> var. <i>italica</i> | Russia              | KY417741        | KY417707        | KY417809        | NA              | NA              |
| <i>Cytospora salicicola</i>      | MFLUCC 14-1052 <sup>T</sup> | <i>Salix alba</i>                        | Russia              | KU982636        | KU982637        | NA              | NA              | NA              |
| <i>Cytospora salicicola</i>      | MFLUCC 15-0866              | <i>Salix</i> sp.                         | Thailand            | KY417749        | KY417715        | KY417817        | NA              | NA              |
| <i>Cytospora salicina</i>        | MFLUCC 15-0862              | <i>Salix alba</i>                        | Russia              | KY417750        | KY417716        | KY417818        | NA              | NA              |

|                                      |                             |                                                       |                     |                 |                 |                 |                 |                 |
|--------------------------------------|-----------------------------|-------------------------------------------------------|---------------------|-----------------|-----------------|-----------------|-----------------|-----------------|
| <i>Cytospora salicina</i>            | MFLUCC 16-0637              | <i>Salix × fragilis</i>                               | Russia              | KY417751        | KY417717        | KY417819        | NA              | NA              |
| <i>Cytospora schulzeri</i>           | CFCC 50042                  | <i>Malus pumila</i>                                   | Gansu, China        | KR045650        | KU711014        | KU710981        | KU710937        | KR045691        |
| <i>Cytospora sibiraeae</i>           | CFCC 50045 <sup>T</sup>     | <i>Sibiraea angustata</i>                             | Gansu, China        | KR045651        | KU711015        | KU710982        | KU710938        | KR045692        |
| <i>Cytospora sibiraeae</i>           | CFCC 50046                  | <i>Sibiraea angustata</i>                             | Gansu, China        | KR045652        | KU711015        | KU710983        | KU710939        | KR045693        |
| <i>Cytospora sophorae</i>            | CFCC 50047                  | <i>Styphnolobium japonicum</i>                        | Shanxi, China       | KR045653        | KU711017        | KU710984        | KU710940        | KR045694        |
| <i>Cytospora sophorae</i>            | CFCC 50048                  | <i>Magnolia grandiflora</i>                           | Shanxi, China       | MH820401        | MH820409        | MH820397        | MH820405        | MH820390        |
| <i>Cytospora sophorae</i>            | CFCC 89598                  | <i>Styphnolobium japonicum</i>                        | Gansu, China        | KR045654        | KU711018        | KU710985        | KU710941        | KR045695        |
| <i>Cytospora sophoricola</i>         | CFCC 89596                  | <i>Styphnolobium japonicum</i><br>var. <i>pendula</i> | Gansu, China        | KR045656        | KU711020        | KU710987        | KU710943        | KR045697        |
| <i>Cytospora sophoricola</i>         | CFCC 89595 <sup>T</sup>     | <i>Styphnolobium japonicum</i><br>var. <i>pendula</i> | Gansu, China        | KR045655        | KU711019        | KU710986        | KU710942        | KR045696        |
| <b><i>Cytospora sophoriopsis</i></b> | <b>CFCC 55469</b>           | <b><i>Salix matsudana</i></b>                         | <b>Gansu, China</b> | <b>MZ702583</b> | <b>OK303445</b> | <b>OK303504</b> | <b>OK303565</b> | <b>OK303632</b> |
| <i>Cytospora sophoriopsis</i>        | CFCC 89600                  | <i>Styphnolobium japonicum</i>                        | Gansu, China        | KR045623        | KU710992        | KU710951        | KU710915        | KP310817        |
| <i>Cytospora sorbi</i>               | MFLUCC 16-0631 <sup>T</sup> | <i>Sorbus aucuparia</i>                               | Russia              | KY417752        | KY417718        | KY417820        | NA              | NA              |
| <i>Cytospora sorbicola</i>           | MFLUCC 16-0584 <sup>T</sup> | <i>Acer pseudoplatanus</i>                            | Russia              | KY417755        | KY417721        | KY417823        | NA              | NA              |
| <i>Cytospora sorbicola</i>           | MFLUCC 16-0633              | <i>Cotoneaster melanocarpus</i>                       | Russia              | KY417758        | KY417724        | KY417826        | NA              | NA              |
| <i>Cytospora sorbina</i>             | CF 20197660 <sup>T</sup>    | <i>Sorbus tianschanica</i>                            | Xinjiang, China     | MK673052        | MK673022        | NA              | MK672943        | MK672968        |
| <i>Cytospora spiraeae</i>            | CFCC 50049 <sup>T</sup>     | <i>Spiraea salicifolia</i>                            | Gansu, China        | MG707859        | MG708196        | MG708199        | NA              | NA              |
| <i>Cytospora spiraeae</i>            | CFCC 50050                  | <i>Spiraea salicifolia</i>                            | Gansu, China        | MG707860        | MG708197        | MG708200        | NA              | NA              |
| <i>Cytospora spiraeicola</i>         | CFCC 53138 <sup>T</sup>     | <i>Spiraea salicifolia</i>                            | Beijing, China      | MN854448        | NA              | MN850749        | MN850756        | MN861118        |
| <i>Cytospora spiraeicola</i>         | CFCC 53139                  | <i>Tilia nobilis</i>                                  | Beijing, China      | MN854449        | NA              | MN850750        | MN850757        | MN861119        |
| <i>Cytospora tamaricicola</i>        | CFCC 50507                  | <i>Rosa multiflora</i>                                | Yunnan, China       | MH933651        | MH933559        | MH933616        | MH933525        | MH933587        |
| <i>Cytospora tamaricicola</i>        | CFCC 50508 <sup>T</sup>     | <i>Tamarix chinensis</i>                              | Yunnan, China       | MH933652        | MH933560        | MH933617        | MH933523        | MH933588        |
| <i>Cytospora tanaitica</i>           | MFLUCC 14-1057 <sup>T</sup> | <i>Betula pubescens</i>                               | Russia              | KT459411        | KT459413        | NA              | NA              | NA              |

|                                |                             |                                                  |                       |          |          |          |          |          |
|--------------------------------|-----------------------------|--------------------------------------------------|-----------------------|----------|----------|----------|----------|----------|
| <i>Cytospora thailandica</i>   | MFLUCC 17-0262 <sup>T</sup> | <i>Xylocarpus moluccensis</i>                    | Thailand              | MG975776 | MH253459 | MH253455 | NA       | NA       |
| <i>Cytospora thailandica</i>   | MFLUCC 17-0263 <sup>T</sup> | <i>Xylocarpus moluccensis</i>                    | Thailand              | MG975777 | MH253460 | MH253456 | NA       | NA       |
| <i>Cytospora tibetensis</i>    | CF 20197026                 | <i>Cotoneaster</i> sp.                           | Tibet, China          | MK673076 | MK673046 | MK673016 | MK672962 | MK672992 |
| <i>Cytospora tibetensis</i>    | CF 20197029                 | <i>Cotoneaster</i> sp.                           | Tibet, China          | MK673077 | MK673047 | MK673017 | MK672963 | MK672993 |
| <i>Cytospora tibetensis</i>    | CF 20197032 <sup>T</sup>    | <i>Cotoneaster</i> sp.                           | Tibet, China          | MK673078 | MK673048 | MK673018 | MK672964 | MK672994 |
| <i>Cytospora tibouchinae</i>   | CPC 26333 <sup>T</sup>      | <i>Tibouchina semidecandra</i>                   | France                | KX228284 | NA       | NA       | NA       | NA       |
| <i>Cytospora translucens</i>   | CXY 1351                    | <i>Populus davidiana</i>                         | Inner Mongolia, China | KM034874 | NA       | NA       | NA       | KM034895 |
| <i>Cytospora translucens</i>   | CXY 1359                    | <i>Populus</i> × <i>Beijingensis</i>             | Beijing, China        | KM034871 | NA       | NA       | NA       | KM034894 |
| <i>Cytospora ulmi</i>          | MFLUCC 15-0863 <sup>T</sup> | <i>Ulmus minor</i>                               | Russia                | KY417759 | NA       | NA       | NA       | NA       |
| <i>Cytospora verrucosa</i>     | CFCC 53157 <sup>T</sup>     | <i>Platyclusus orientalis</i>                    | Beijing, China        | MW418408 | NA       | MW422911 | MW422923 | MW422935 |
| <i>Cytospora verrucosa</i>     | CFCC 53158                  | <i>Platyclusus orientalis</i>                    | Beijing, China        | MW418410 | MW422901 | MW422913 | MW422925 | MW422937 |
| <i>Cytospora verrucosa</i>     | CFCC 54369                  | <i>Platyclusus orientalis</i>                    | Beijing, China        | MW418409 | NA       | MW422912 | MW422924 | MW422936 |
| <i>Cytospora verrucosa</i>     | CFCC 54370                  | <i>Platyclusus orientalis</i>                    | Beijing, China        | MW418411 | MW422902 | MW422914 | MW422926 | MW422938 |
| <i>Cytospora vinacea</i>       | CBS 141585 <sup>T</sup>     | <i>Vitis interspecific</i><br>hybrid ‘Vidal’     | USA                   | KX256256 | NA       | NA       | KX256277 | KX256235 |
| <i>Cytospora viridistroma</i>  | CBS 202.36 <sup>T</sup>     | <i>Cercis canadensis</i> Castigl.                | USA                   | MN172408 | NA       | NA       | MN271853 | NA       |
| <i>Cytospora viticola</i>      | Cyt2                        | <i>Vitis interspecific</i><br>hybrid ‘Frontenac’ | USA                   | KX256238 | NA       | NA       | KX256259 | KX256217 |
| <i>Cytospora viticola</i>      | CBS 141586 <sup>T</sup>     | <i>Vitis vinifera</i><br>‘CabernetFranc’         | USA                   | KX256239 | NA       | NA       | KX256260 | KX256218 |
| <i>Cytospora xinjiangensis</i> | CFCC 53182                  | <i>Rosa</i> sp.                                  | Xinjiang, China       | MK673064 | MK673034 | MK673004 | MK672951 | MK672980 |
| <i>Cytospora xinjiangensis</i> | CFCC 53183 <sup>T</sup>     | <i>Rosa</i> sp.                                  | Xinjiang, China       | MK673065 | MK673035 | MK673005 | MK672952 | MK672981 |
| <i>Cytospora xinglongensis</i> | CFCC 52458                  | <i>Castanea mollissima</i>                       | China                 | MK432622 | MK442946 | MK578082 | NA       | NA       |

|                                |                             |                              |          |          |          |          |          |          |
|--------------------------------|-----------------------------|------------------------------|----------|----------|----------|----------|----------|----------|
| <i>Cytospora xinglongensis</i> | CFCC 52459                  | <i>Castanea mollissima</i>   | China    | MK432623 | MK442947 | MK578083 | NA       | NA       |
| <i>Cytospora xylocarpi</i>     | MFLUCC 17-0251 <sup>T</sup> | <i>Xylocarpus granatum</i>   | Thailand | MG975775 | MH253458 | MH253454 | NA       | NA       |
| <i>Diaporthe vaccinii</i>      | CBS 160.32                  | <i>Vaccinium macrocarpon</i> | USA      | KC343228 | JQ807297 | NA       | KC343954 | KC344196 |

<sup>1</sup> Acronyms: ATCC: American Type Culture Collection, Virginia, USA; BBH: BIOTEC Bangkok Herbarium, National Science and Technology Development Agency, Thailand; CBS: Westerdijk Fungal Biodiversity Institute (CBS-KNAW Fungal Biodiversity Centre), Utrecht, The Netherlands; CFCC: China Forestry Culture Collection Centre, Beijing, China; CMW: Culture collection of Michael Wingfield, University of Pretoria, South Africa; CPC: Culture collection of Pedro Crous, The Netherlands; IMI: Culture collection of the International Mycological Institute, CABI Bioscience, Egham, Surrey, UK; MFLU: Mae Fah Luang University herbarium, Thailand; MFLUCC: Mae Fah Luang University Culture Collection, Thailand; MUCC: Murdoch University Culture Collection, Perth, Australia; NE: Gerard Adams collections, University of Nebraska, Lincoln NE, USA; PPRI: Culture collection of the Plant Protection Research Institute, Agriculture Research Center, Pretoria, South Africa; XJAU: Xinjiang Agricultural University, Xinjiang, China; NA: not applicable. All the new isolates used in this study are in bold and the type materials are marked with T.

**Table S3.** The regression equations and the estimated optimum growth temperature, pH value, and carbon source.

| Species                                      | Regression Equations of Temperature (x = temperature (°C), y = growth (colony diameter, mm)) | Temperature Range (°C) | Estimated Optimum Growth Temperature | Regression Equations of pH (x = pH, y = growth (colony diameter, mm))           | pH Range | Estimated Optimum Growth pH | Estimated Optimum Growth Carbon Source |
|----------------------------------------------|----------------------------------------------------------------------------------------------|------------------------|--------------------------------------|---------------------------------------------------------------------------------|----------|-----------------------------|----------------------------------------|
| <i>Cytospora alba</i> (CFCC 55402)           | $y_{\text{Day1}} = -0.0005x^3 + 0.0035x^2 + 0.6438x + 4.6768$ ( $R^2 = 0.7348$ )             | 0–30                   | 21.1                                 | $y_{\text{Day1}} = 0.3546x^3 - 8.5492x^2 + 61.603x - 110.27$ ( $R^2 = 0.9957$ ) | 3.0–10.0 | 5.6                         | fructose                               |
|                                              | $y_{\text{Day2}} = -0.0009x^3 - 0.033x^2 + 2.6289x + 2.3212$ ( $R^2 = 0.8171$ )              |                        |                                      | $y_{\text{Day2}} = 0.5799x^3 - 14.068x^2 + 101.43x - 177.67$ ( $R^2 = 0.9252$ ) |          |                             |                                        |
|                                              | $y_{\text{Day3}} = -0.0007x^3 - 0.1103x^2 + 5.3437x + 1.9394$ ( $R^2 = 0.8513$ )             |                        |                                      | $y_{\text{Day3}} = 0.6425x^3 - 16.478x^2 + 124.19x - 217.02$ ( $R^2 = 0.8945$ ) |          |                             |                                        |
|                                              | $y_{\text{Day4}} = -0.0004x^3 - 0.1762x^2 + 7.4157x + 7.4949$ ( $R^2 = 0.9055$ )             |                        |                                      | $y_{\text{Day4}} = 0.4139x^3 - 11.886x^2 + 95.703x - 151.21$ ( $R^2 = 0.8693$ ) |          |                             |                                        |
| <i>Cytospora paracinnamomea</i> (CFCC 55453) | $y_{\text{Day1}} = -0.0006x^3 + 0.0147x^2 + 0.3385x + 5.5222$ ( $R^2 = 0.8937$ )             | 0–30                   | 21.9                                 | $y_{\text{Day1}} = 0.2383x^3 - 5.3296x^2 + 35.599x - 57.712$ ( $R^2 = 0.9028$ ) | 3.0–10.0 | 5.4                         | fructose, glucose, and maltose         |
|                                              | $y_{\text{Day2}} = -0.0009x^3 - 0.0406x^2 + 3.0735x + 2.7606$ ( $R^2 = 0.9161$ )             |                        |                                      | $y_{\text{Day2}} = 0.9923x^3 - 23.044x^2 + 160.21x - 287.09$ ( $R^2 = 0.9761$ ) |          |                             |                                        |
|                                              | $y_{\text{Day3}} = -0.0017x^3 - 0.0843x^2 + 5.8622x + 5.7758$ ( $R^2 = 0.944$ )              |                        |                                      | $y_{\text{Day3}} = 1.0142x^3 - 25.35x^2 + 188.44x - 350.98$ ( $R^2 = 0.9806$ )  |          |                             |                                        |
|                                              | $y_{\text{Day4}} = -0.0014x^3 - 0.1473x^2 + 7.7947x + 13.211$ ( $R^2 = 0.9641$ )             |                        |                                      | $y_{\text{Day4}} = 1.037x^3 - 27.082x^2 + 208.41x - 391.11$ ( $R^2 = 0.9361$ )  |          |                             |                                        |
