# Supplementary figures and images for: Fungal Richness of Cytospora Species Associated with Willow Canker Disease in China
Source: MDPI journal article supplement (doi:10.3390/jof8040377), 2022-04-07

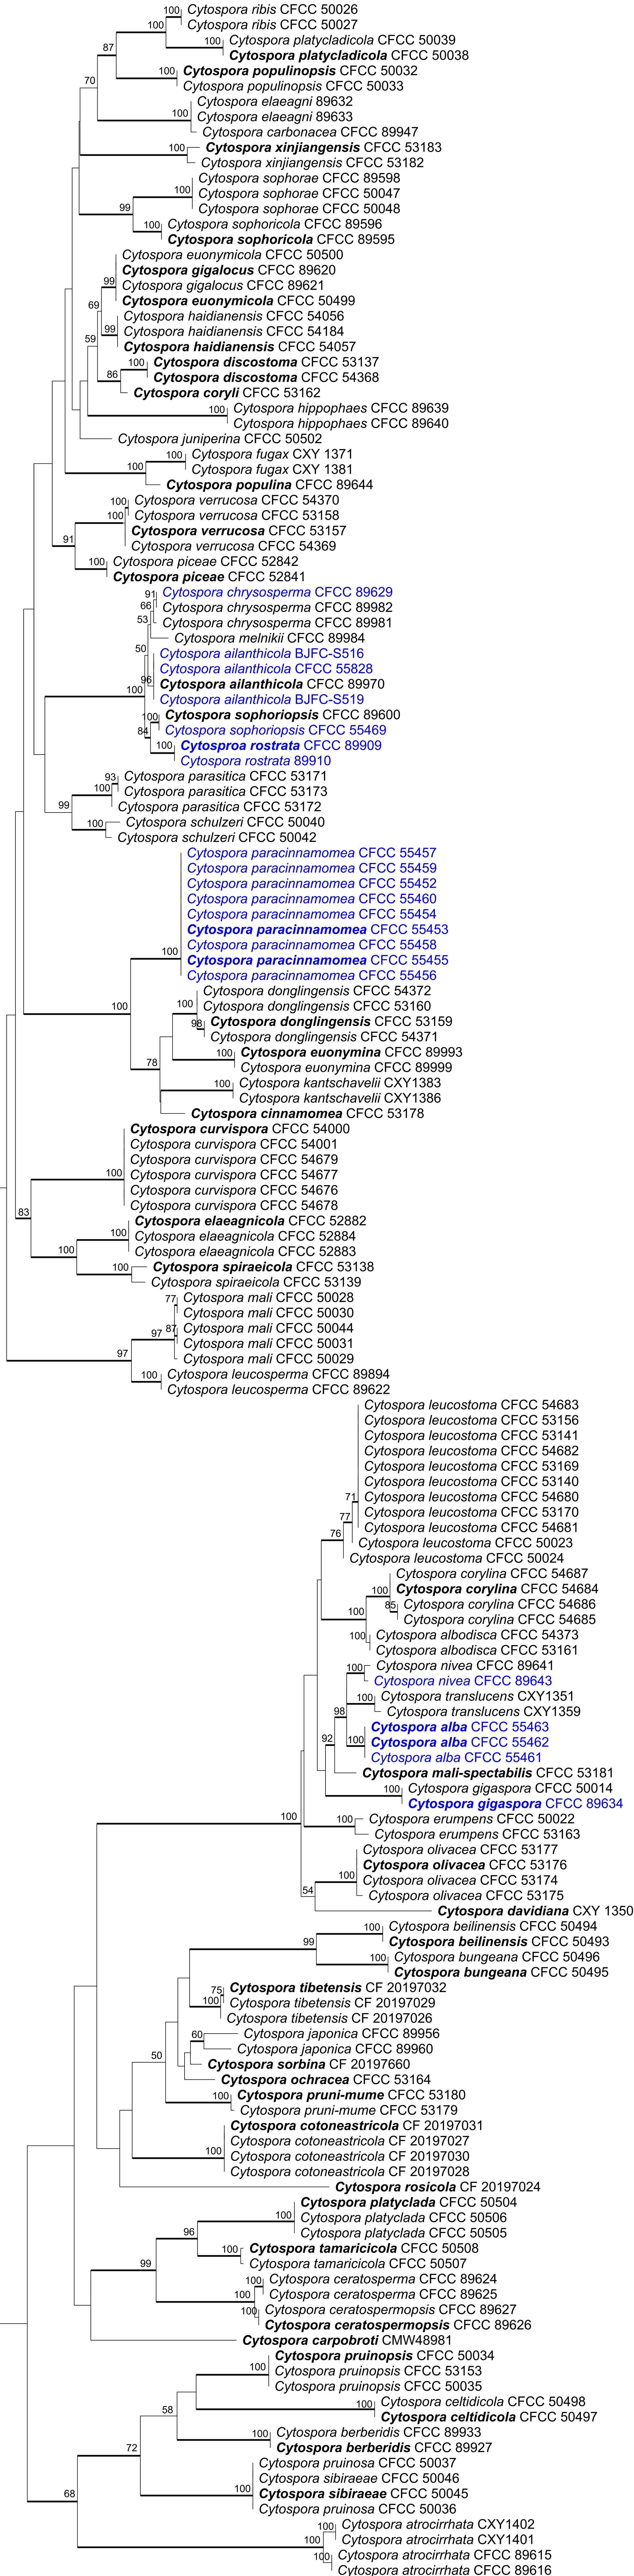

*Diaporthe vaccinii* CBS 160.32

Supplement: s1 [file s1]

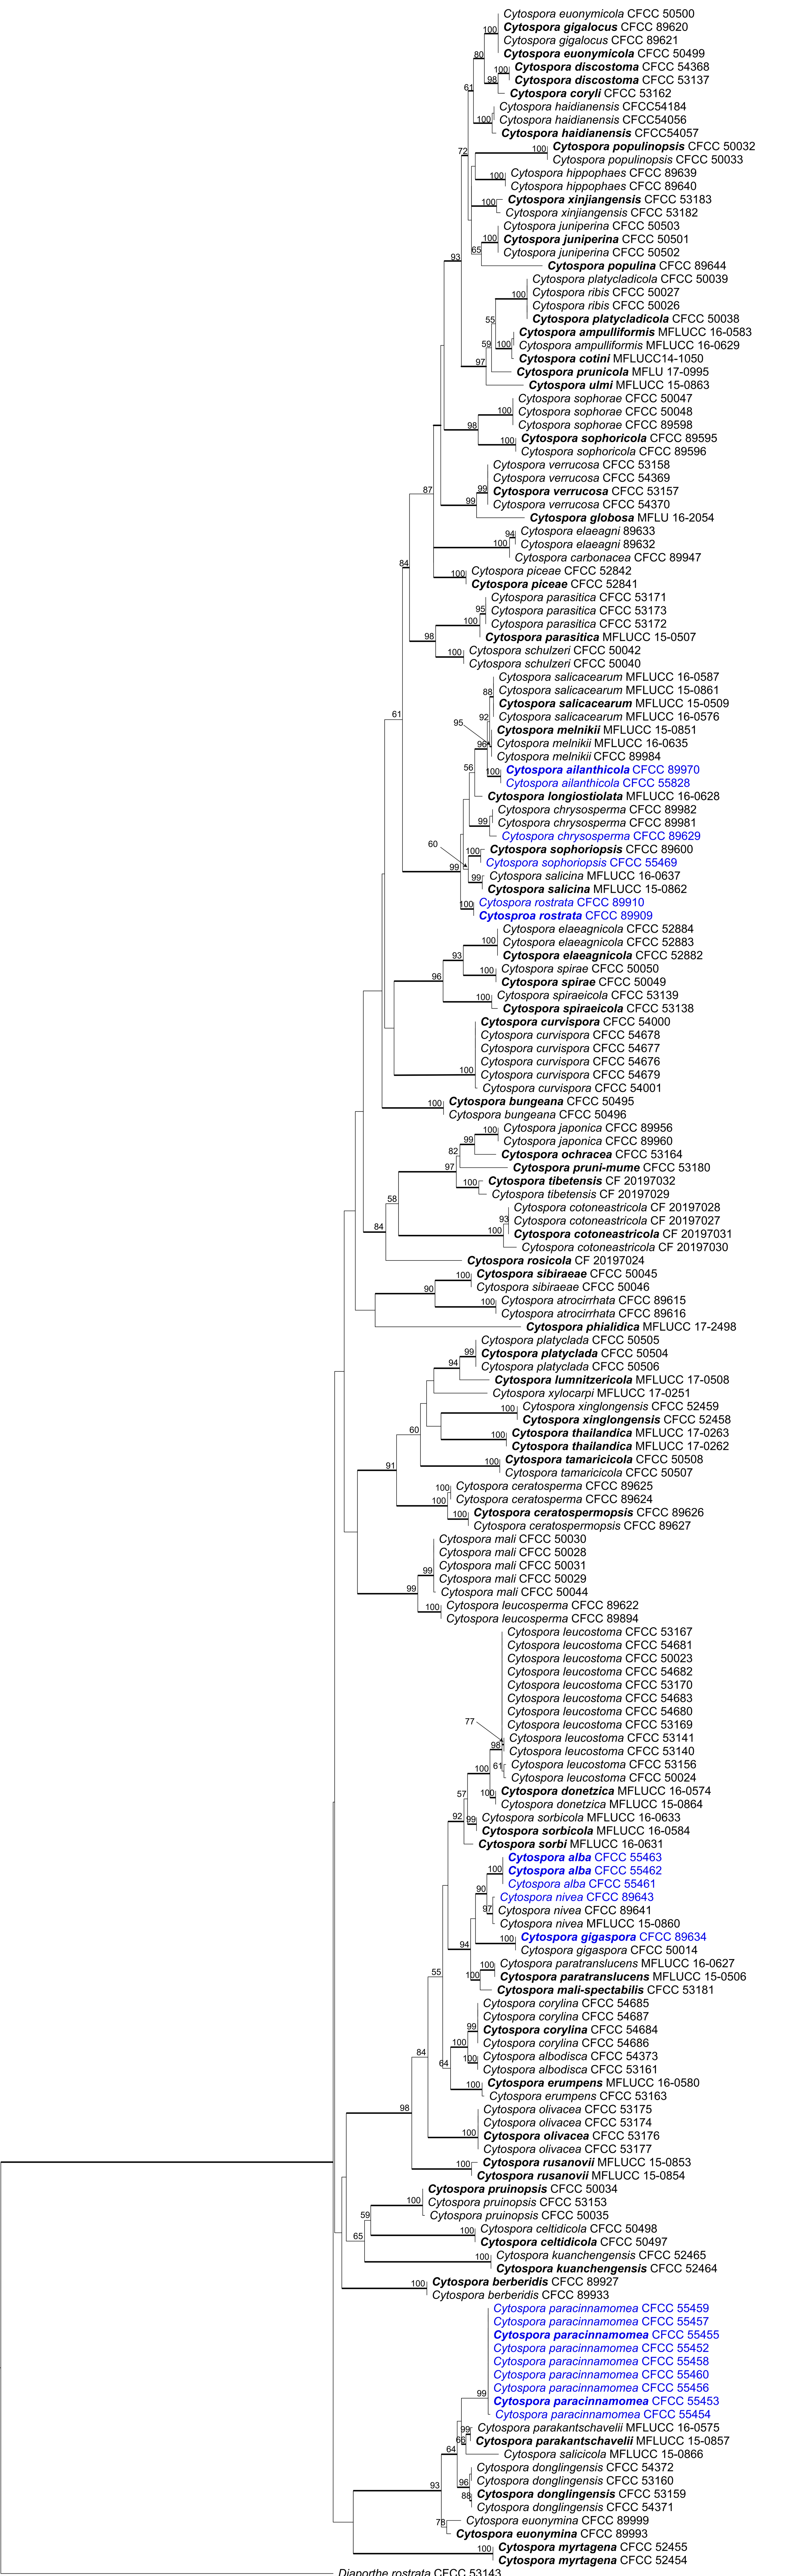

Supplement: s1 [file s1]

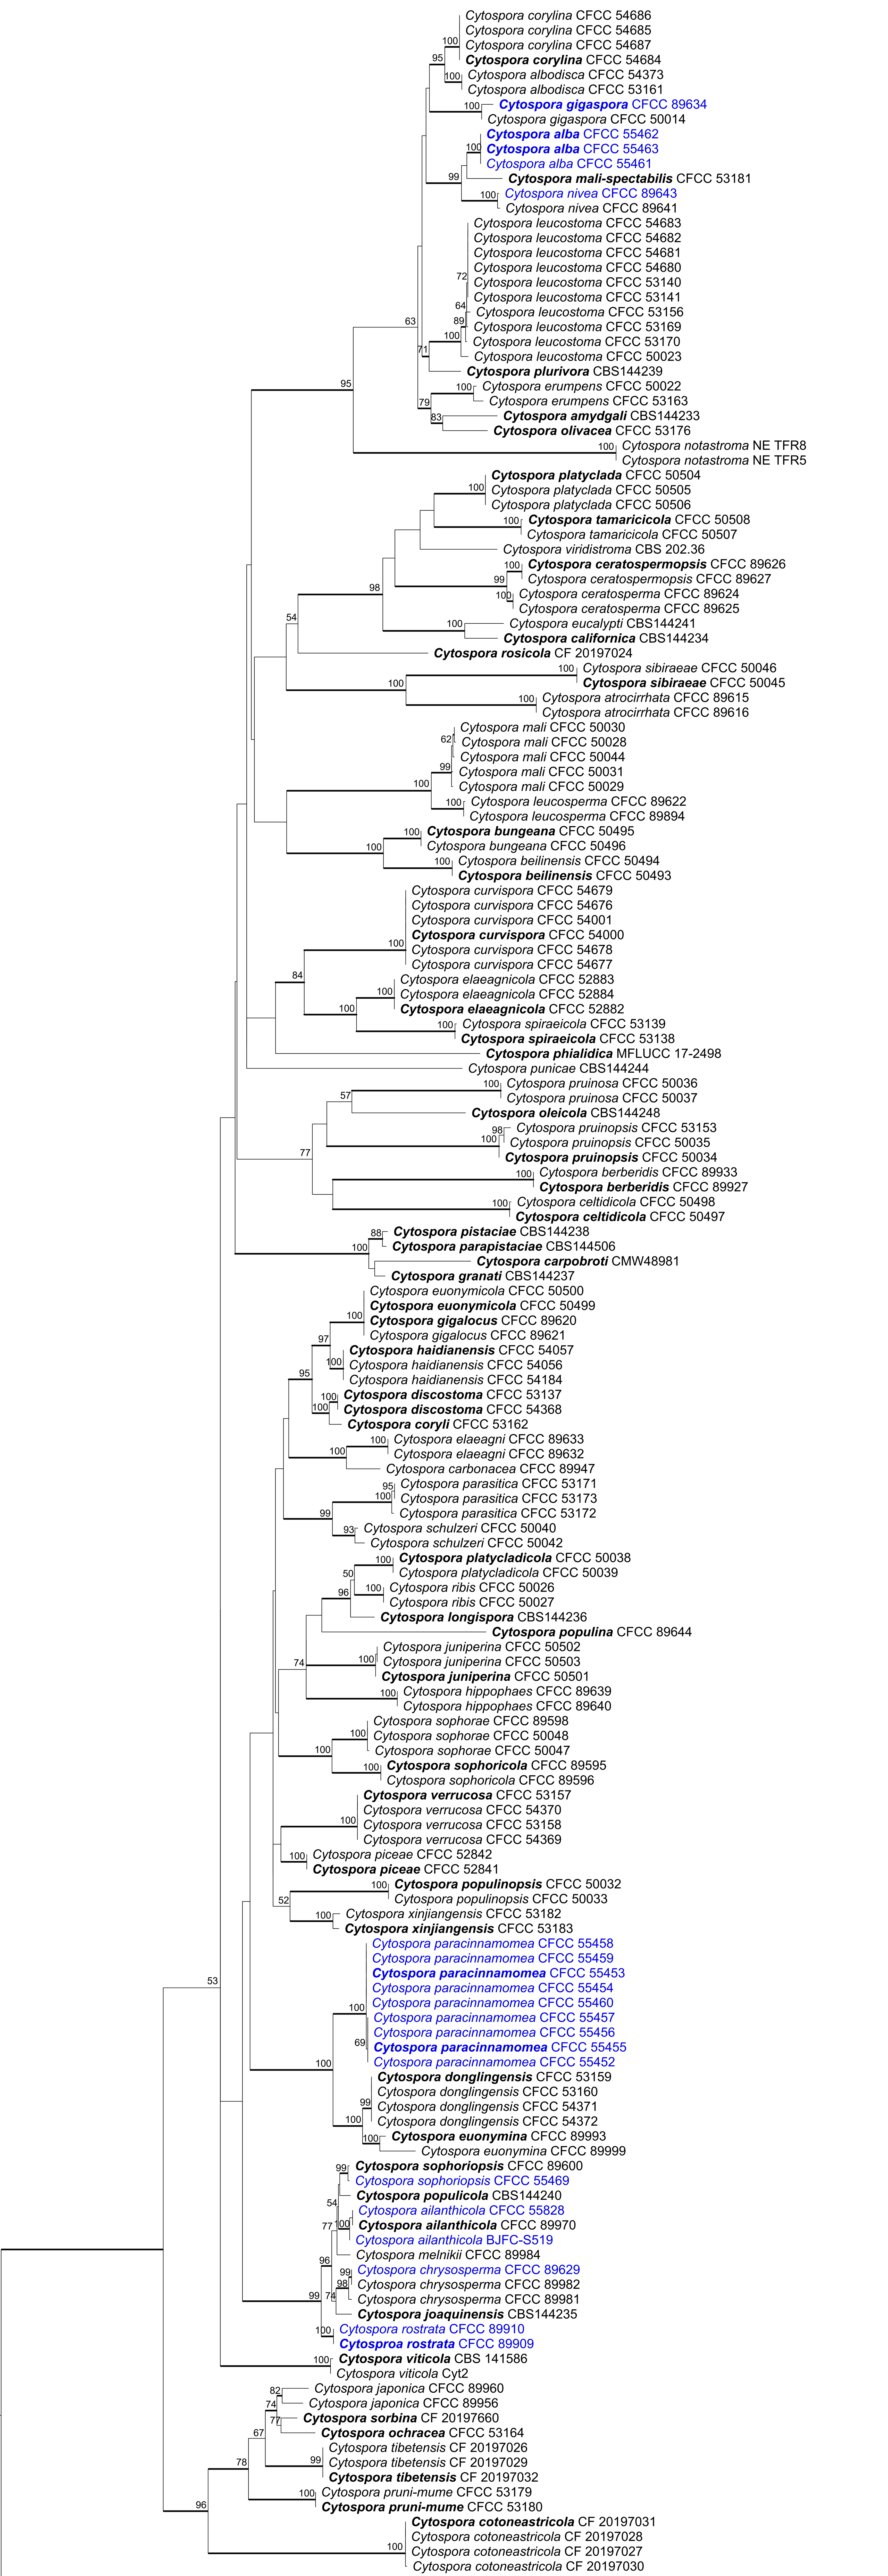

Supplement: s1 [file s1]

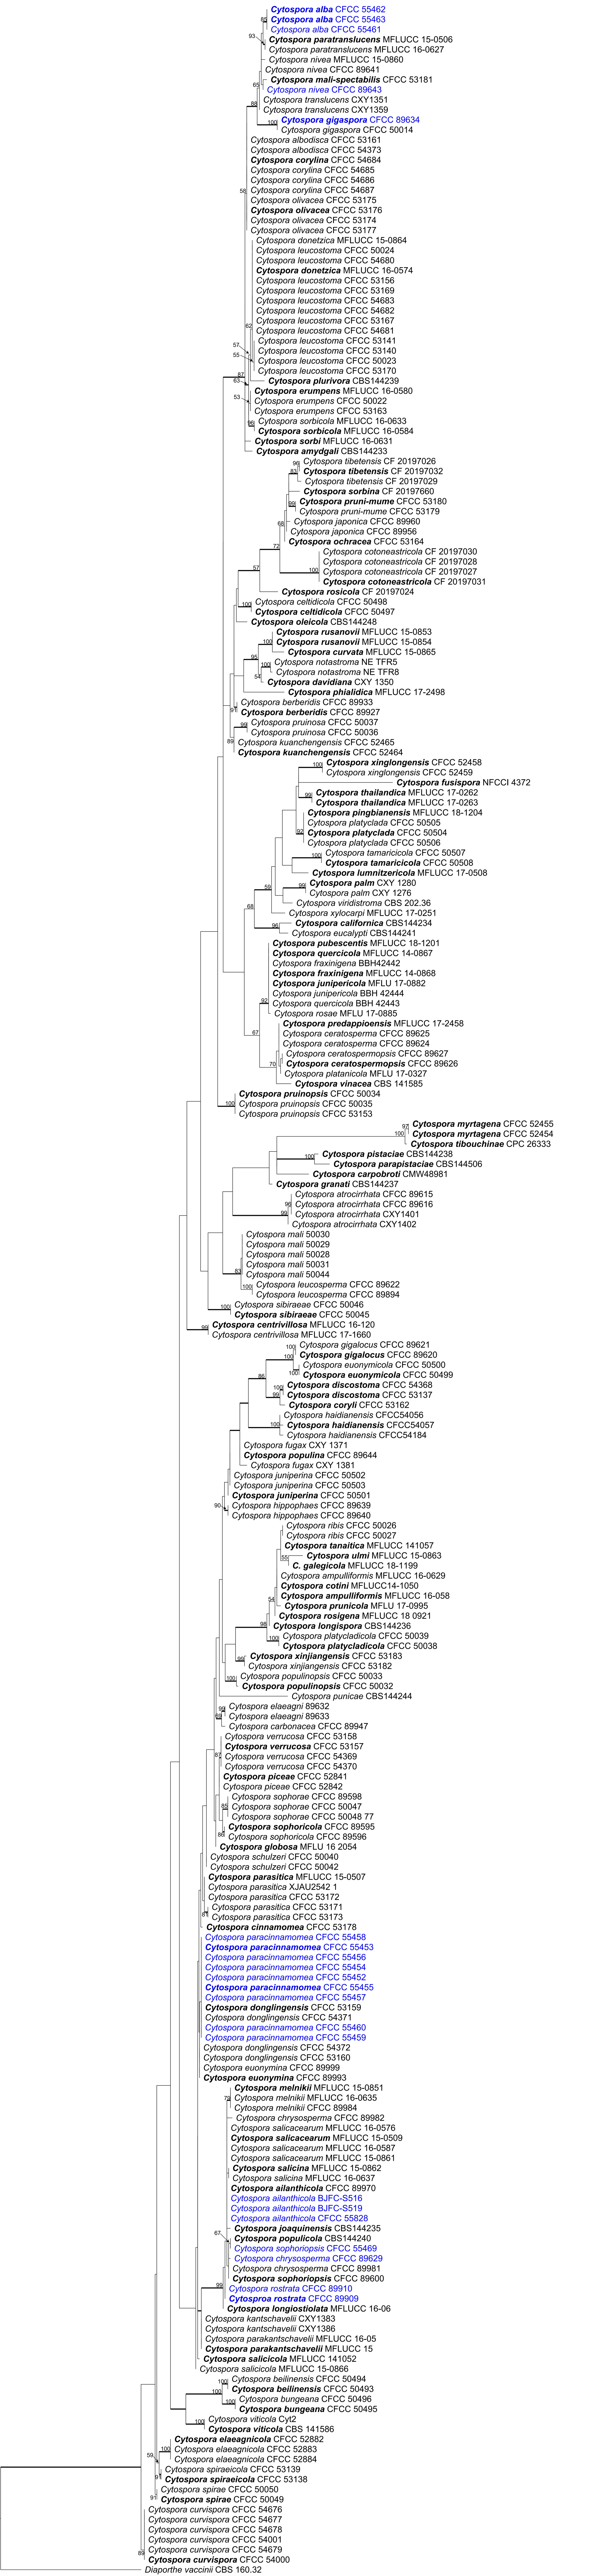

Supplement: s1 [file s1]

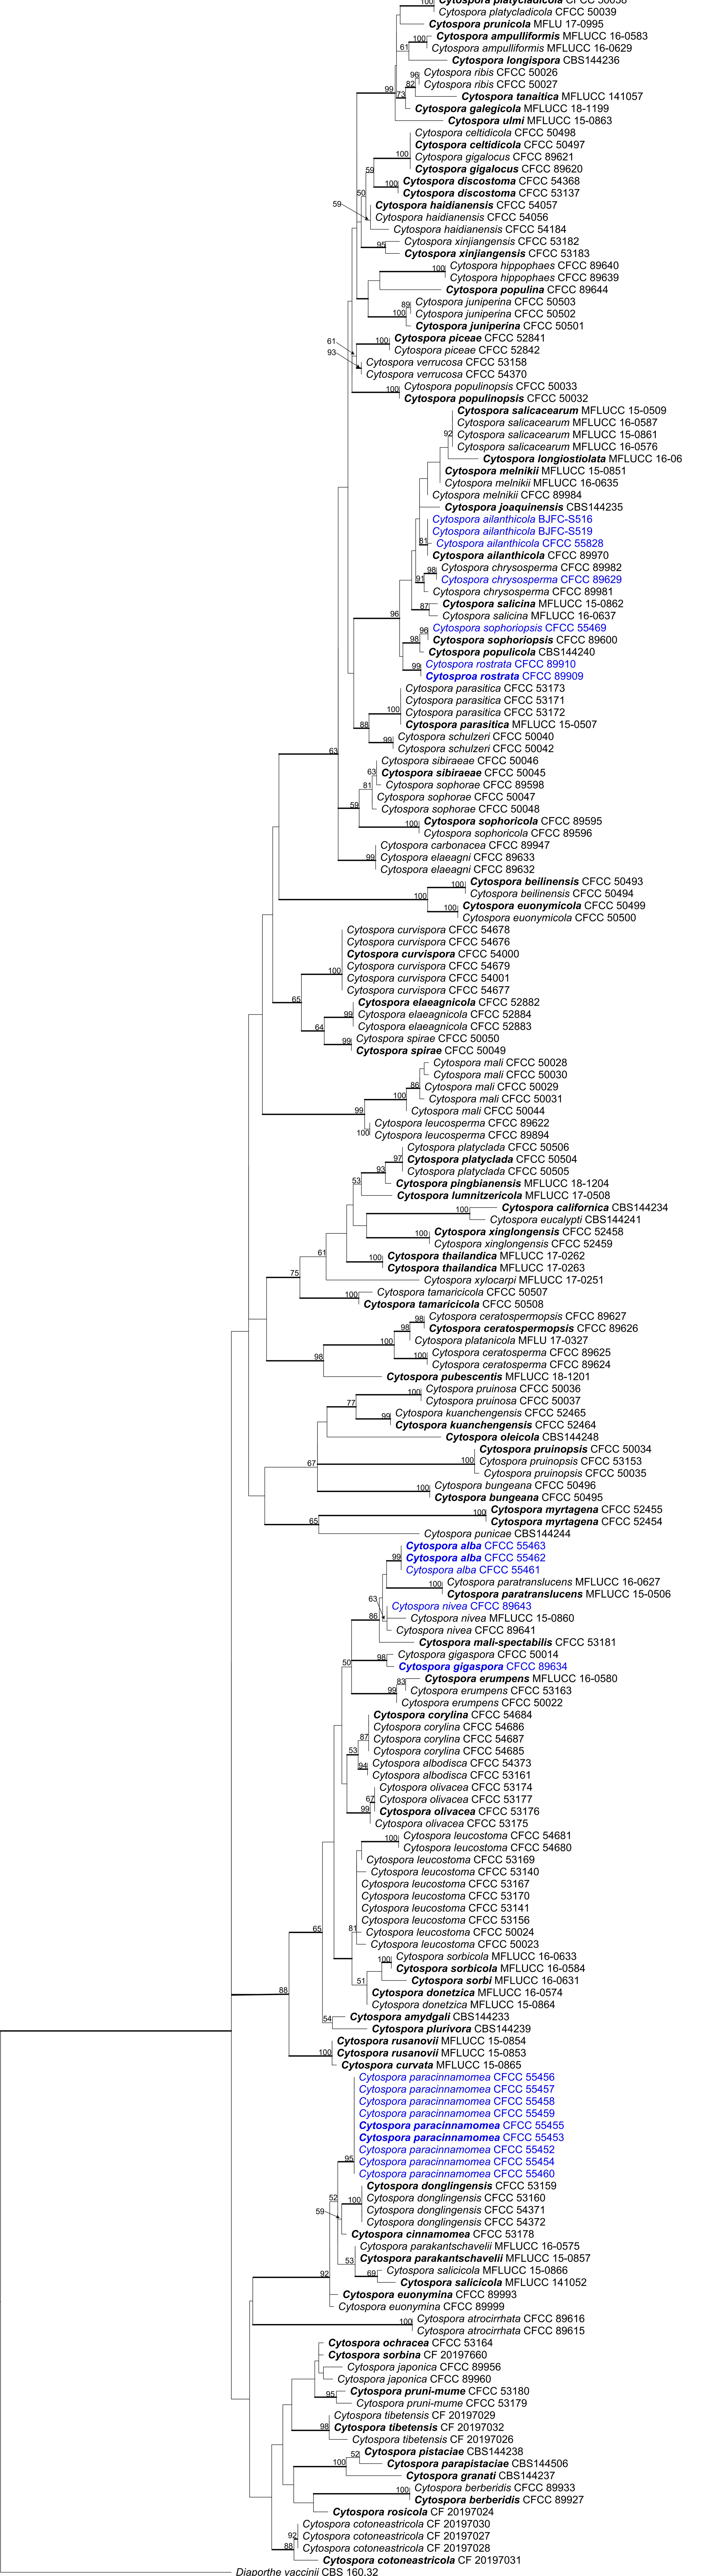

Supplement: s1 [file s1]
